# Supplementary material
Source: PubMed Central journal article supplement (PMC8121527)
Supplement: jci-131-145973-s153.pdf [file jci-131-145973-s153.pdf]

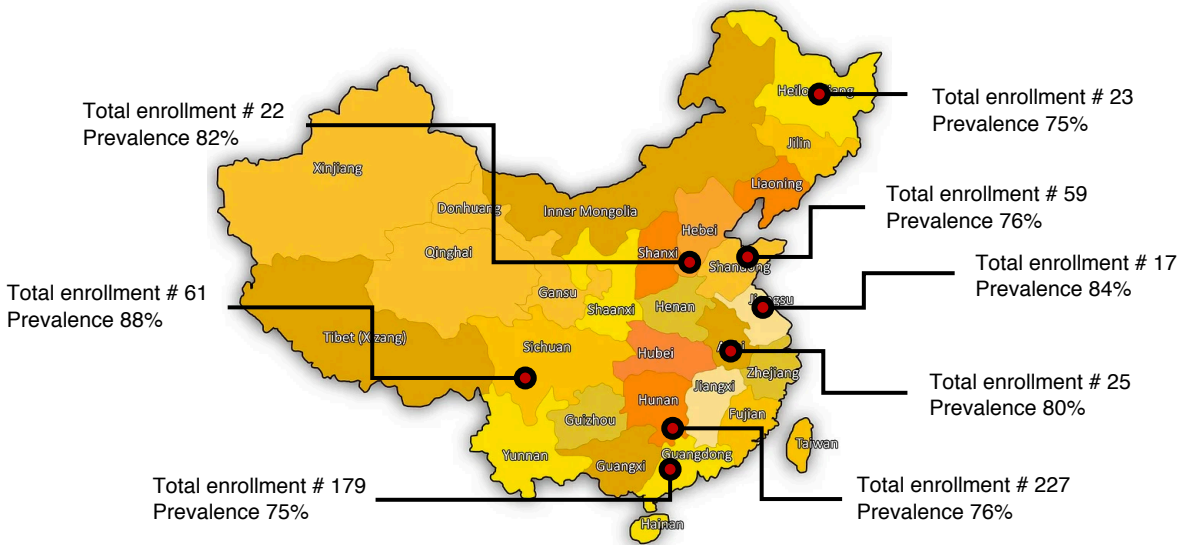

**Figure S1 Details of recruited patients from 14 clinical sites.** The total number of enrollment patients and the malignancy prevalence from different provinces of China was illustrated.

A.

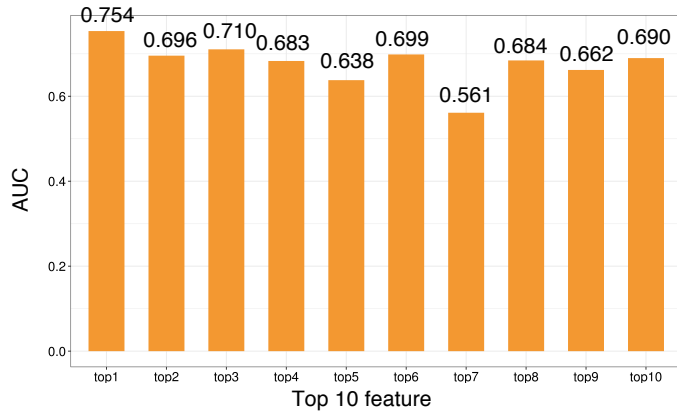

B.

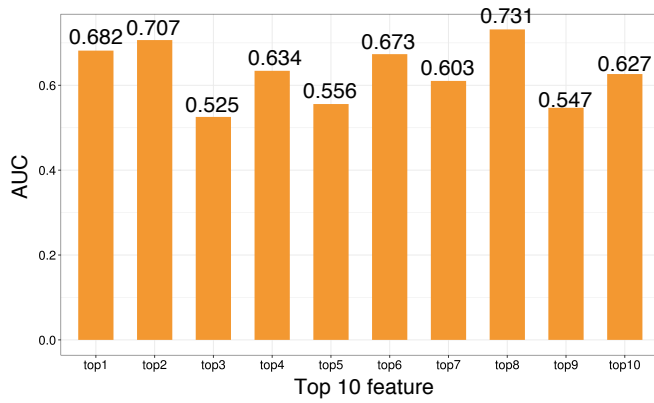

**Figure S2 AUC performance of top 10 model markers.** A. AUC performance of top 10 individual model feature in the training set B. AUC performance of top 10 individual model feature in the test set.

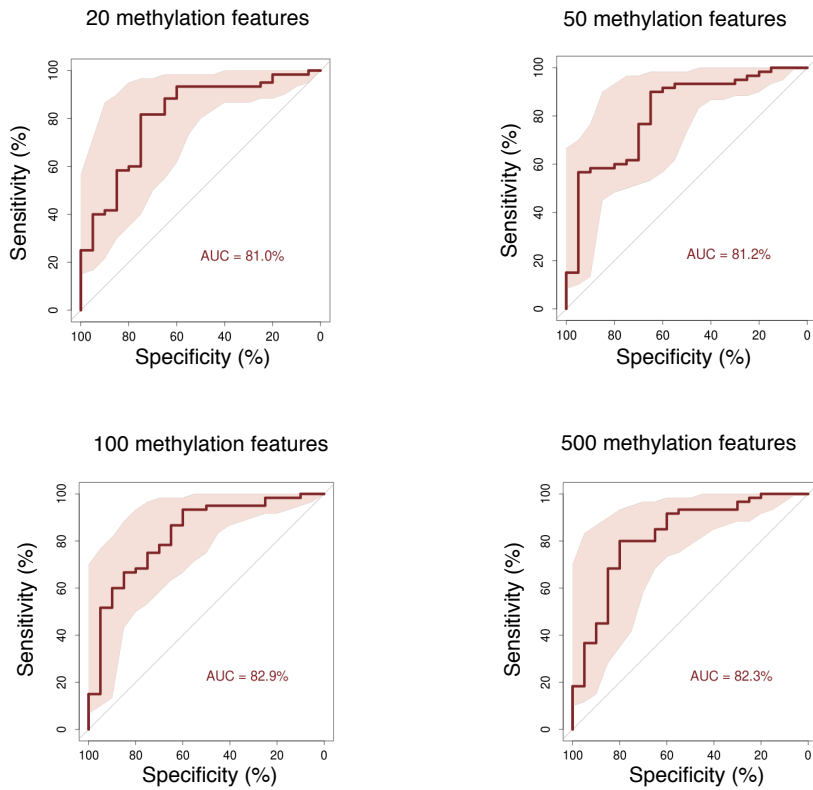

**Figure S3 Performance of lung nodule model using different features in the test set.** Representative receiver operating curves (ROCs) displays the classification performance of the methylation classifier using different numbers of features in the test set.

A.

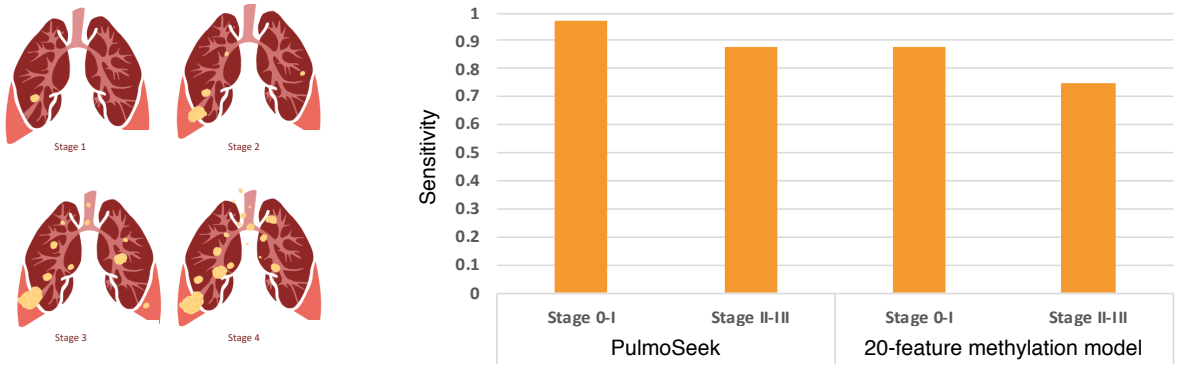

B.

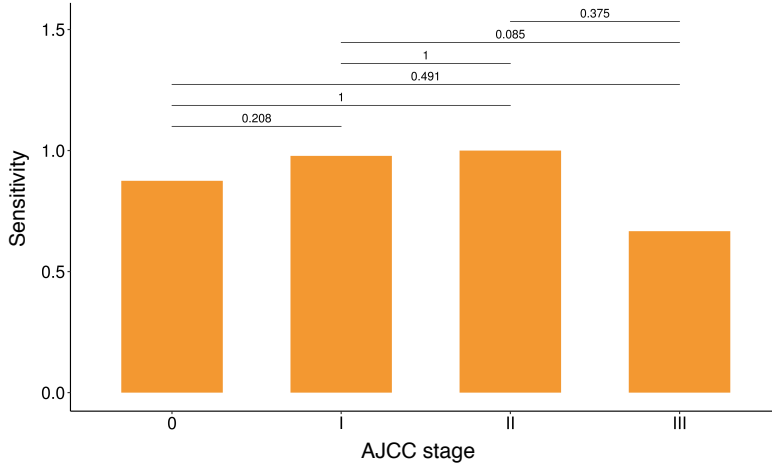

C.

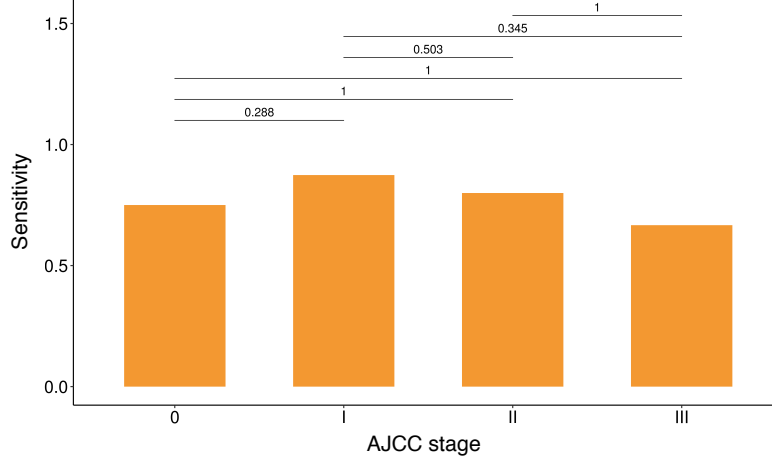

**Figure S4 PulmoSeek performance in different stages (combined test and validation set).** A. Top 100 (PulmoSeek) and Top 20 methylation models' performance in different stages in the combined test and validation set. Sensitivity of PulmoSeek in stage 0-I 0.971 [0.942-0.993], in stage II-III 0.875 [0.625-1.000]. Sensitivity of 20-feature methylation model in stage 0-I 0.877 [0.819-0.935], in stage II-III 0.750 [0.500-1.000] B. Comparison of PulmoSeek performances within different groups of stages in combined test and validation set C. Comparison of 20-feature model performances within different groups of stages in combined test and validation set. Stage 0 (n=8), stage I (n=135), stage II (n=5) and stage III (n=3). Comparisons of sensitivities for different stages were calculated using Fisher exact test.

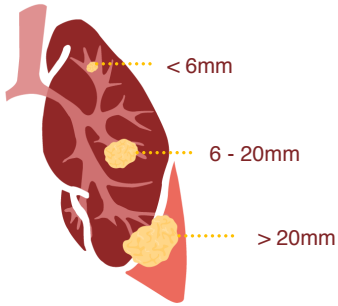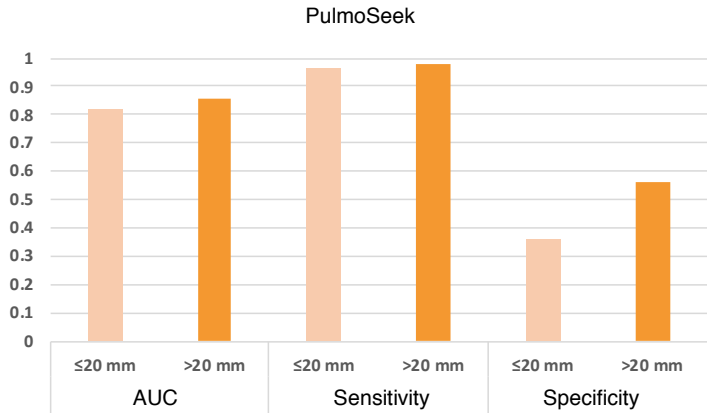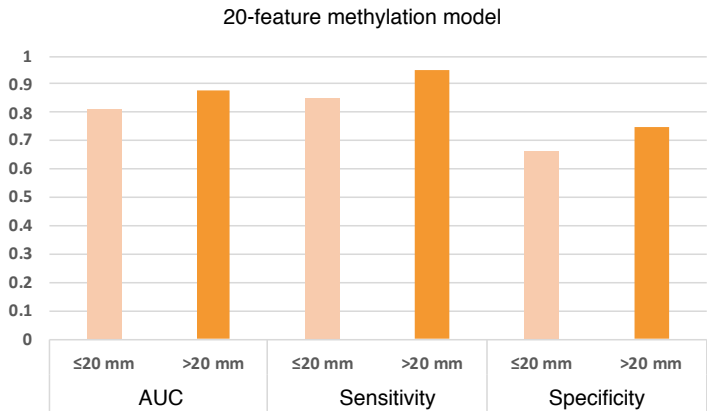

**Figure S5 PulmoSeek performance in different nodule sizes.** Top 100 (PulmoSeek) and Top 20 methylation models' performances in different nodule sizes in the combined test and validation set. *PulmoSeek*: AUC in ≤20 mm group 0.820 [0.742-0.891], in >20 mm group 0.860 [0.740-0.964]; Sensitivity in ≤20 mm group 0.966 [0.573-0.991], in >20 mm group 0.977 [0.628-1.000]; Specificity in ≤20 mm group 0.364 [0.273-0.932], in >20 mm group 0.562 [0.375-0.938]; *20-feature methylation model*: AUC in ≤20 mm group 0.811 [0.730-0.880], in >20 mm group 0.879 [0.775-0.967]; Sensitivity in ≤20 mm group 0.846 [0.650-0.966], in >20 mm group 0.963 [0.860-1.000]; Specificity in ≤20 mm group 0.659 [0.364-0.841], in >20 mm group 0.750 [0.438-0.938]. ≤20 mm group (n=160), >20 mm group (n=59).

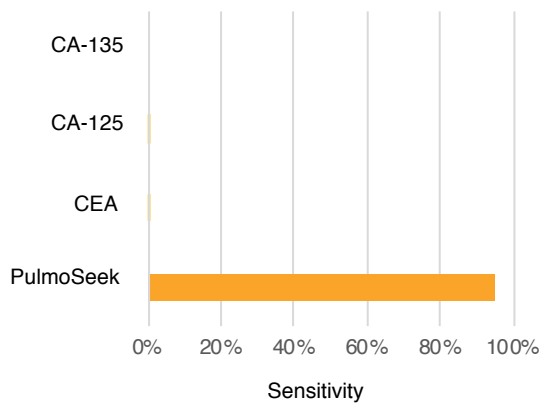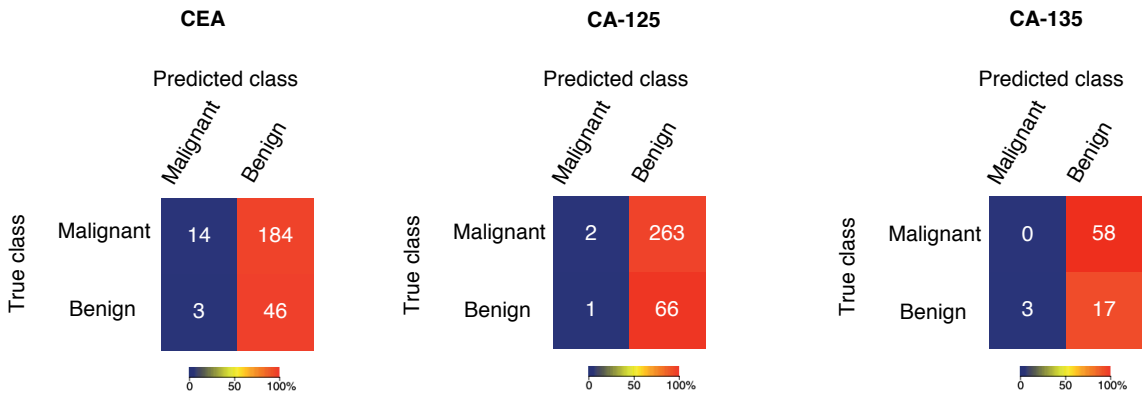

**Figure S6 Cancer biomarker (CEA, CA-125, CA-135) performance.** Classical cancer biomarkers (CEA, CA-125, CA-135) performance illustrated using confusion matrices.

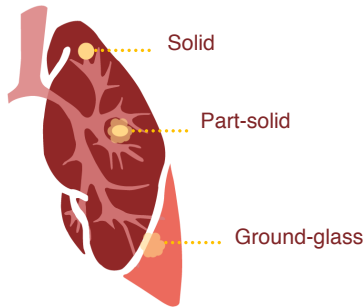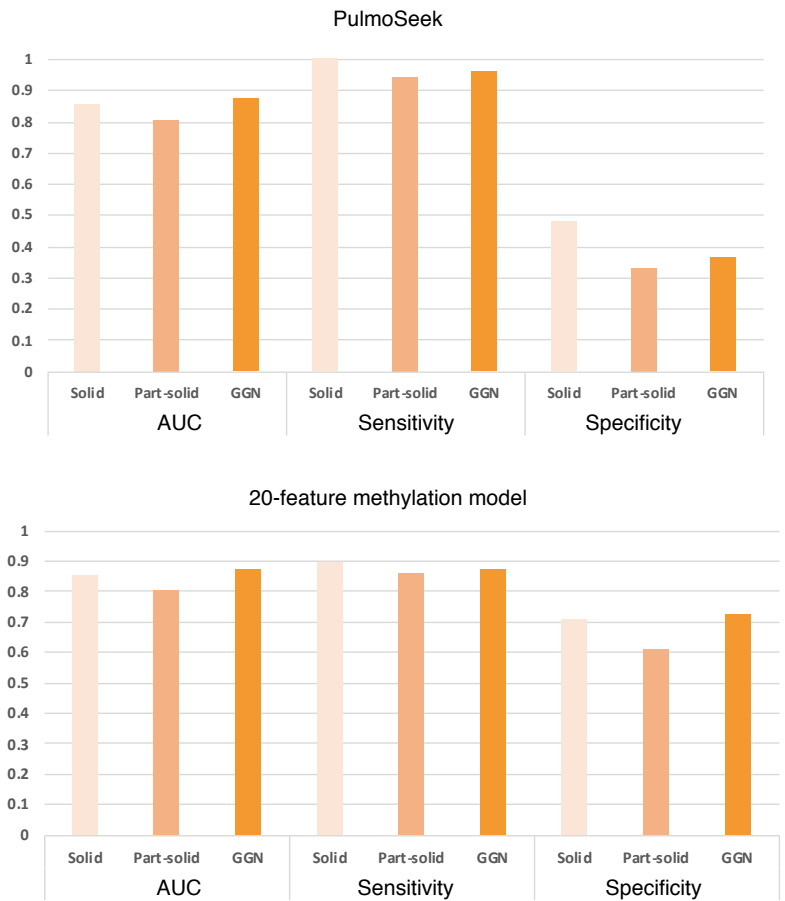

**Figure S7 PulmoSeek performance in different nodule subtypes.** Top 100 (PulmoSeek) and Top 20 methylation models' performance in different nodule subtypes (Solid, Part-solid and GGN) in the combined test and validation set. *PulmoSeek*: AUC in solid 0.858 [0.761-0.938], in part-solid 0.808 [0.695-0.906], in GGN 0.878 [0.766-0.963]; Sensitivity in solid 1.000 [0.702-1.000], in part-solid 0.947 [0.509-1.000], in GGN 0.964 [0.518-1.000]; Specificity in solid 0.484 [0.387-0.903], in part-solid 0.333 [0.222-0.944], in GGN 0.364 [0.182-1.000]; *20-feature methylation model*: AUC in solid 0.854 [0.759-0.934], in part-solid 0.803 [0.686-0.909], in GGN 0.872 [0.752-0.963]; Sensitivity in solid 0.894 [0.809-1.000], in part-solid 0.860 [0.702-0.965], in GGN 0.875 [0.696-0.982]; Specificity in solid 0.710 [0.484-0.871], in part-solid 0.611 [0.222-0.833], in GGN 0.727 [0.182-1.000]. Solid group (n=78), part-solid group (n=75), GGN group (n=67).

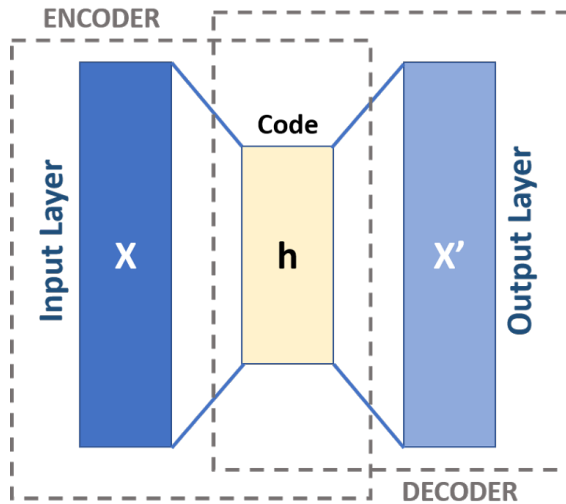

**Figure S8 The general architecture of an autoencoder (AE) neural network.** The AE model was composed of two modules, i.e., an encoder and a decoder, which were both implemented by neural networks. The encoder encoded the input matrix  $X$  into a hidden vector  $h$ . The decoder reconstructed a matrix  $X'$  from  $h$ , which should be as close to  $X$  as possible. The loss function of this model was formulated as:  $L = \|X - X'\|_2 / (r \times c)$ , where  $r$  and  $c$  were the number of rows and columns of  $X$ , respectively. After the model was trained, the encoder was used again to retrieve the hidden vector for each input, which was used as the representation of each input in the downstream pipeline.



**Table S1 Characteristics of patients in training, test and validation sets stratified by cancer status**

| Category        | Training Set      |                |         | Test Set          |                |         | Validation Set    |                |         |
|-----------------|-------------------|----------------|---------|-------------------|----------------|---------|-------------------|----------------|---------|
|                 | Malignant Nodules | Benign Nodules | P value | Malignant Nodules | Benign Nodules | P value | Malignant Nodules | Benign Nodules | P value |
| Total Number    | 253               | 56             |         | 60                | 20             |         | 100               | 40             |         |
| Median Age - yr | 58 (28-85)        | 50 (28-75)     | ***     | 59 (36-76)        | 50.5 (30-75)   |         | 55 (23-84)        | 54 (35-72)     |         |
| Gender – No.    |                   |                |         |                   |                |         |                   |                |         |
| Male            | 103               | 32             |         | 31                | 12             |         | 50                | 21             |         |
| Female          | 150               | 24             |         | 29                | 8              |         | 50                | 19             |         |
| Smoking history |                   |                |         |                   |                |         |                   |                |         |
| Status – No.    |                   |                |         |                   |                |         |                   |                |         |
| Never           | 194               | 41             |         | 39                | 14             |         | 71                | 28             |         |
| Former          | 29                | 5              |         | 12                | 4              |         | 12                | 5              |         |
| Current         | 29                | 10             |         | 8                 | 2              |         | 17                | 7              |         |
| No data         | 1                 | 0              |         | 1                 | 0              |         | 0                 | 0              |         |
| Pack-year       | 30 (3–90)         | 30 (5–120)     |         | 35 (2–100)        | 30 (3.5–40)    |         | 30 (4–200)        | 17.5 (1–40)    |         |
| Lesion size     |                   |                |         |                   |                |         |                   |                |         |
| < 5 mm          | 0                 | 0              |         | 0                 | 0              |         | 0                 | 0              |         |
| 5 – 20 mm       | 180               | 43             |         | 43                | 14             |         | 73                | 30             |         |
| 20 – 30 mm      | 68                | 12             |         | 16                | 6              |         | 27                | 10             |         |
| >30 mm          | 0                 | 0              |         | 0                 | 0              |         | 0                 | 0              |         |
| No data         | 5                 | 1              |         | 1                 | 0              |         | 0                 | 0              |         |
| Location – no.  |                   |                |         |                   |                |         |                   |                |         |
| Upper lobe      | 98                | 27             |         | 26                | 10             |         | 26                | 20             |         |
| Lower lobe      | 155               | 29             |         | 34                | 10             |         | 74                | 20             |         |

Age and nodule size between malignant and benign groups were compared using Student's T test. Gender and nodule locations were compared using Fisher' exact test. \*P<0.05, \*\*P<0.01, \*\*\*P<0.001

**Table S2 Characteristics of patients in training, test and validation sets stratified by nodule types**

| Categories | Training Set |        | Test Set  |        | Validation Set |        | Total |
|------------|--------------|--------|-----------|--------|----------------|--------|-------|
|            | Malignant    | Benign | Malignant | Benign | Malignant      | Benign |       |
| GGN        | 85           | 7      | 24        | 2      | 32             | 9      | 159   |
| Part-solid | 99           | 17     | 15        | 6      | 42             | 12     | 191   |
| Solid      | 69           | 32     | 21        | 12     | 26             | 19     | 179   |
| Total      | 253          | 56     | 60        | 20     | 100            | 40     |       |

**Table S3 Characteristics of patients in training, test and validation sets stratified by cancer stages**

| <b><i>Cancer Stage</i></b> | <b>Training Set</b> | <b>Test Set</b> | <b>Validation Set</b> | <b>Total</b> |
|----------------------------|---------------------|-----------------|-----------------------|--------------|
| 0                          | 17                  | 6               | 2                     | 25           |
| I                          | 207                 | 44              | 86                    | 337          |
| II                         | 13                  | 6               | 0                     | 19           |
| III                        | 9                   | 2               | 0                     | 11           |
| IV                         | 0                   | 0               | 0                     | 0            |
| Unknown                    | 7                   | 2               | 12                    | 21           |
| Total                      | 253                 | 60              | 100                   | 413          |

**Table S6 Pulmonary nodule model (20-, 50- and 500- feature) performance metrics**

| <b>All Nodule Sizes</b>                            |                          |                           |                                    |
|----------------------------------------------------|--------------------------|---------------------------|------------------------------------|
|                                                    | <b>20-feature model</b>  |                           |                                    |
|                                                    | Test Set<br>(N=80)       | Validation Set<br>(N=140) | Test and Validation Set<br>(N=220) |
| Accuracy (95%CI)                                   | 0.800 (0.675-0.912)      | 0.836 (0.757-0.886)       | 0.823 (0.736-0.877)                |
| Sensitivity (95%CI)                                | 0.817 (0.617-0.983)      | 0.910 (0.770-0.990)       | 0.875 (0.719-0.975)                |
| Specificity (95%CI)                                | 0.750 (0.500-0.950)      | 0.650 (0.300-0.800)       | 0.683 (0.417-0.833)                |
| Positive predictive value (95%CI)*                 | 0.907 (0.848-0.979)      | 0.867 (0.778-0.919)       | 0.881 (0.812-0.925)                |
| Negative predictive value (95%CI)*                 | 0.577 (0.429-0.900)      | 0.743 (0.568-0.952)       | 0.672 (0.512-0.895)                |
| Positive predictive value (95%CI) <sup>&amp;</sup> | 0.266 (0.172-0.635)      | 0.224 (0.135-0.335)       | 0.235 (0.153-0.339)                |
| Negative predictive value (95%CI) <sup>&amp;</sup> | 0.974 (0.953-0.996)      | 0.985 (0.967-0.998)       | 0.980 (0.962-0.995)                |
|                                                    | <b>50-feature model</b>  |                           |                                    |
|                                                    | Test Set<br>(N=80)       | Validation Set<br>(N=140) | Test and Validation Set<br>(N=220) |
| Accuracy (95%CI)                                   | 0.800 (0.713-0.912)      | 0.793 (0.729-0.857)       | 0.795 (0.741-0.859)                |
| Sensitivity (95%CI)                                | 0.800 (0.667-0.967)      | 0.850 (0.760-0.980)       | 0.831 (0.744-0.969)                |
| Specificity (95%CI)                                | 0.800 (0.550-0.950)      | 0.650 (0.375-0.800)       | 0.700 (0.467-0.817)                |
| Positive predictive value (95%CI)*                 | 0.923 (0.859-0.981)      | 0.859 (0.790-0.915)       | 0.881 (0.823-0.925)                |
| Negative predictive value (95%CI)*                 | 0.571 (0.454-0.867)      | 0.634 (0.521-0.905)       | 0.609 (0.519-0.857)                |
| Positive predictive value (95%CI) <sup>&amp;</sup> | 0.308 (0.185-0.658)      | 0.212 (0.143-0.323)       | 0.235 (0.162-0.339)                |
| Negative predictive value (95%CI) <sup>&amp;</sup> | 0.973 (0.957-0.994)      | 0.975 (0.961-0.995)       | 0.974 (0.963-0.993)                |
|                                                    | <b>500-feature model</b> |                           |                                    |
|                                                    | Test Set<br>(N=80)       | Validation Set<br>(N=140) | Test and Validation Set<br>(N=220) |
| Accuracy (95%CI)                                   | 0.838 (0.625-0.912)      | 0.821 (0.636-0.871)       | 0.827 (0.645-0.873)                |
| Sensitivity (95%CI)                                | 0.900 (0.517-0.967)      | 0.950 (0.580-0.990)       | 0.931 (0.581-0.975)                |
| Specificity (95%CI)                                | 0.650 (0.550-1.000)      | 0.500 (0.350-0.875)       | 0.550 (0.450-0.917)                |
| Positive predictive value (95%CI)*                 | 0.885 (0.853-1.000)      | 0.826 (0.788-0.933)       | 0.847 (0.821-0.949)                |
| Negative predictive value (95%CI)*                 | 0.684 (0.392-0.895)      | 0.800 (0.421-0.957)       | 0.750 (0.423-0.889)                |
| Positive predictive value (95%CI) <sup>&amp;</sup> | 0.222 (0.177-1.000)      | 0.174 (0.142-0.384)       | 0.187 (0.160-0.438)                |
| Negative predictive value (95%CI) <sup>&amp;</sup> | 0.983 (0.946-0.996)      | 0.989 (0.942-0.998)       | 0.986 (0.946-0.995)                |

\* Cancer prevalence = 78% in the current cohort  
 & Cancer prevalence = 10%, reported in an intended-use population

**Table S7 PulmoSeek performance in sub-validation cohorts with different prevalence****Sub-validation Cohorts 1 – Malignancy Prevalence 79%**

| <b>PulmoSeek</b>                  | <b>23 B + 90 M</b>  |
|-----------------------------------|---------------------|
| Accuracy (95%CI)                  | 0.858 (0.681-0.920) |
| Sensitivity (95%CI)               | 1.000 (0.633-1.000) |
| Specificity (95%CI)               | 0.304 (0.174-0.957) |
| Positive predictive value (95%CI) | 0.849 (0.826-0.985) |
| Negative predictive value (95%CI) | 0.720 (0.370-1.000) |

**Sub-validation Cohorts 2 – Malignancy Prevalence 50%**

| <b>PulmoSeek</b>                  | <b>7 B + 7 M</b>    |
|-----------------------------------|---------------------|
| Accuracy (95%CI)                  | 0.500 (0.357-0.857) |
| Sensitivity (95%CI)               | 0.857 (0.143-1.000) |
| Specificity (95%CI)               | 0.500 (0.350-0.875) |
| Positive predictive value (95%CI) | 0.500 (0.364-1.000) |
| Negative predictive value (95%CI) | 0.900 (0.200-1.000) |

**Sub-validation Cohorts 3 – Malignancy Prevalence 23%**

| <b>PulmoSeek</b>                  | <b>12 B + 3 M</b>   |
|-----------------------------------|---------------------|
| Accuracy (95%CI)                  | 0.667 (0.444-1.000) |
| Sensitivity (95%CI)               | 1.000 (1.000-1.000) |
| Specificity (95%CI)               | 0.571 (0.286-1.000) |
| Positive predictive value (95%CI) | 0.400 (0.286-1.000) |
| Negative predictive value (95%CI) | 1.000 (1.000-1.000) |

**Table S8 Validation of the PulmoSeek performance with different histology types in the combined test and validation set**

|                  | Histology Type          | Negative | Positive | Total | Sensitivity | Specificity |
|------------------|-------------------------|----------|----------|-------|-------------|-------------|
| <b>Malignant</b> | AIS                     | 1        | 7        | 8     | 87.5%       |             |
|                  | MIA                     | 1        | 20       | 21    | 95.2%       |             |
|                  | IA                      | 2        | 108      | 110   | 98.2%       |             |
|                  | SC                      | 1        | 9        | 10    | 90.0%       |             |
|                  | SCLC                    | 0        | 1        | 1     | 100.0%      |             |
|                  | Others                  | 0        | 10       | 10    | 100.0%      |             |
|                  | <b>Sum of Malignant</b> | 5        | 155      | 160   | 96.9%       |             |
| <b>Benign</b>    | GRAN                    | 1        | 5        | 6     |             |             |
|                  | HAM                     | 2        | 4        | 6     |             |             |
|                  | INF                     | 12       | 15       | 27    |             |             |
|                  | Others                  | 10       | 11       | 21    |             |             |
|                  | <b>Sum of Benign</b>    | 25       | 35       | 60    |             | 47.6%       |

AIS: adenocarcinoma *in situ*; MIA: minimally invasive adenocarcinoma; IA: invasive adenocarcinoma; SC: squamous cell; SCLC: small cell  
 GRAN: granuloma; HAM: hamartoma; INF: inflammation

**Table S9 Characteristics of 6-20mm patients in training, test and validation sets stratified by cancer status**

| Category     | Test Set          |                |         | Validation Set    |                |         |
|--------------|-------------------|----------------|---------|-------------------|----------------|---------|
|              | Malignant Nodules | Benign Nodules | P value | Malignant Nodules | Benign Nodules | P value |
| Total Number | 42                | 14             |         | 71                | 29             |         |
| Age - yr     | 56 (36-76)        | 52.5 (30-75)   |         | 54 (23-75)        | 53 (35-72)     |         |
| Gender – no. |                   |                |         |                   |                |         |
| Male         | 19                | 8              |         | 31                | 15             |         |
| Female       | 23                | 6              |         | 40                | 14             |         |
| Category     |                   |                |         |                   |                |         |
| GGN          | 20                | 2              |         | 27                | 8              |         |
| Part-solid   | 11                | 3              |         | 26                | 9              |         |
| Solid        | 11                | 9              |         | 18                | 12             |         |
| Cancer stage |                   |                |         |                   |                |         |
| 0 - I        | 37                |                |         | 63                |                |         |
| IIA          | 1                 |                |         | 0                 |                |         |
| IIB          | 1                 |                |         | 0                 |                |         |
| III          | 1                 |                |         | 0                 |                |         |
| IV           | 0                 |                |         | 0                 |                |         |
| Unknown      | 2                 |                |         | 8                 |                |         |

Age between malignant and benign groups was compared using Student's T test. Gender and nodule subtype were compared using Fisher's exact test. \*P<0.05, \*\*P<0.01, \*\*\*P<0.001

**Table S10 PulmoSeek performance metrics in 6-10 mm, 11-15 mm and 16-20 mm lesion sizes**

| <b>PulmoSeek</b>                    | <b>6-10 mm (N=35)</b> | <b>11-15 mm (N=38)</b> | <b>16-20 mm (N=24)</b> |
|-------------------------------------|-----------------------|------------------------|------------------------|
| AUC (95%CI)                         | 0.670 (0.479-0.837)   | 0.929 (0.831-0.997)    | 1.000 (1.000-1.000)    |
| Accuracy (95%CI)                    | 0.750 (0.444-0.806)   | 0.769 (0.641-0.949)    | 0.920 (0.800-1.000)    |
| Sensitivity (95%CI)                 | 1.000 (0.417-1.000)   | 1.000 (0.500-1.000)    | 1.000 (0.762-1.000)    |
| Specificity (95%CI)                 | 0.250 (0.083-0.833)   | 0.308 (0.077-1.000)    | 0.500 (0.250-1.000)    |
| Positive predictive value (95%CI)*  | 0.727 (0.600-0.875)   | 0.743 (0.684-1.000)    | 0.913 (0.875-1.000)    |
| Negative predictive value (95%CI)*  | 1.000 (0.250-1.000)   | 1.000 (0.477-1.000)    | 1.000 (0.444-1.000)    |
| Positive predictive value (95%CI) & | 0.129 (0.077-0.280)   | 0.138 (0.107-1.000)    | 0.182 (0.129-1.000)    |
| Negative predictive value (95%CI) & | 1.000 (0.857-1.000)   | 1.000 (0.942-1.000)    | 1.000 (0.974-1.000)    |

\* Cancer prevalence = 78%, in the current cohort

& Cancer prevalence = 10%, reported in an intended-use population



**Table S11 PulmoSeek performance compared to integration of PET-CT after PulmoSeek in the combined test and validation set**

**AGE 40-70, with PET-CT record**

| <b>Solid nodules only (N=14)</b>                    |                     |                      |
|-----------------------------------------------------|---------------------|----------------------|
|                                                     | PulmoSeek           | PulmoSeek + PET-CT * |
| False Positive Ratio                                | 14.2% (2 out of 14) | 16.6% (2 out of 12)  |
| False Negative Ratio                                | 0% (0 out of 0)     | 100% (2 out of 2)    |
| <b>Combined solid and part-solid nodules (N=27)</b> |                     |                      |
|                                                     | PulmoSeek           | PulmoSeek + PET-CT * |
| False Positive Ratio                                | 14.8% (4 out of 27) | 11.7% (2 out of 17)  |
| False Negative Ratio                                | 0% (0 out of 0)     | 80.0% (8 out of 10)  |

**AGE 56-70, with PET-CT record**

| <b>Solid only (N = 9)</b>                             |                     |                      |
|-------------------------------------------------------|---------------------|----------------------|
|                                                       | PulmoSeek           | PulmoSeek + PET-CT * |
| False Positive Ratio                                  | 22.2% (2 out of 9)  | 28.5% (2 out of 7)   |
| False Negative Ratio                                  | 0% (0 out of 0)     | 100% (2 out of 2)    |
| <b>Combined solid and part-solid nodules (N = 27)</b> |                     |                      |
|                                                       | PulmoSeek           | PulmoSeek + PET-CT * |
| False Positive Ratio                                  | 12.5% (2 out of 16) | 18.1% (2 out of 11)  |
| False Negative Ratio                                  | 0% (0 out of 0)     | 100% (5 out of 5)    |

\* PET-CT testing on the positive group using PulmoSeek
